# Supplementary material
Source: PubMed Central journal article supplement (PMC5990022)
Supplement: NIHMS967853-supplement-PMBaabe37_supplementarymaterial_pdf.pdf [file NIHMS967853-supplement-PMBaabe37_supplementarymaterial_pdf.pdf]

## Supplemental Data

**Table A1.** The detailed comparison data between the actual measurement and simulation results of ‘0.5mm grid’ in YZ-plane. ‘Actual’ denotes the results obtained from the hydrophone measurement, ‘Sim.’ represents the simulation results, and  $\Delta_F$ ,  $\Delta_l$ ,  $\Delta_w$ , and  $\Delta_{PR}$  are respective differences of focal location, focal length, width, and pressure peak ratio between the actual measurement and simulation results. The nomenclature was used throughout the remainder of supplementary data.

| Rotation/<br>Skull ID |    | YZ-plane acoustic pressure profile |               |                    |                  |              |                    |                   |              |                    |                     |             |                          |
|-----------------------|----|------------------------------------|---------------|--------------------|------------------|--------------|--------------------|-------------------|--------------|--------------------|---------------------|-------------|--------------------------|
|                       |    | Focal position                     |               |                    | Long axis length |              |                    | Short axis length |              |                    | Pressure peak ratio |             |                          |
|                       |    | Actual<br>(Y,Z)                    | Sim.<br>(Y,Z) | $\Delta_F$<br>(mm) | Actual<br>(mm)   | Sim.<br>(mm) | $\Delta_l$<br>(mm) | Actual<br>(mm)    | Sim.<br>(mm) | $\Delta_w$<br>(mm) | Actual<br>(%)       | Sim.<br>(%) | $\Delta_{PR}$<br>(Ratio) |
| Ref<br>0°             | S1 | (2,29)                             | (0,30)        | 2.2                | 19               | 22           | 3                  | 5                 | 4            | 1                  | 44.0                | 46.9        | 0.07                     |
|                       | S2 | (0,28)                             | (-1,29)       | 1.4                | 19               | 17           | 2                  | 5                 | 4            | 1                  | 55.6                | 51.6        | 0.07                     |
|                       | S3 | (0,27)                             | (-1,26)       | 1.4                | 15               | 14           | 1                  | 4                 | 5            | 1                  | 67.5                | 73.2        | 0.08                     |
|                       | S4 | (0,28)                             | (-1,26)       | 2.2                | 17               | 13           | 4                  | 3                 | 4            | 1                  | 68.3                | 69.7        | 0.02                     |
|                       | S5 | (1,27)                             | (0,27)        | 1.0                | 16               | 14           | 2                  | 4                 | 4            | 0                  | 73.6                | 71.2        | 0.03                     |
| X<br>+10°             | S1 | (4,29)                             | (1,30)        | 3.2                | 20               | 16           | 4                  | 5                 | 4            | 1                  | 39.3                | 45.2        | 0.15                     |
|                       | S2 | (0,29)                             | (0,26)        | 3.0                | 20               | 14           | 6                  | 5                 | 4            | 1                  | 60.9                | 54.8        | 0.10                     |
|                       | S3 | (0,27)                             | (1,28)        | 1.4                | 16               | 16           | 0                  | 4                 | 5            | 1                  | 67.5                | 68.5        | 0.01                     |
|                       | S4 | (-1,27)                            | (0,27)        | 1.0                | 15               | 14           | 1                  | 4                 | 3            | 1                  | 73.9                | 71.8        | 0.03                     |
|                       | S5 | (1,27)                             | (0,27)        | 1.0                | 16               | 16           | 0                  | 4                 | 5            | 1                  | 69.6                | 70.9        | 0.02                     |
| X<br>+15°             | S1 | (3,24)                             | (0,31)        | 7.6                | 16               | 23           | 7                  | 6                 | 4            | 2                  | 41.0                | 42.1        | 0.03                     |
|                       | S2 | (0,29)                             | (0,26)        | 3.0                | 19               | 12           | 7                  | 4                 | 3            | 1                  | 59.6                | 54.2        | 0.09                     |
|                       | S3 | (1,27)                             | (2,26)        | 1.4                | 18               | 15           | 3                  | 5                 | 6            | 1                  | 63.6                | 65.1        | 0.02                     |
|                       | S4 | (0,29)                             | (0,28)        | 1.0                | 18               | 16           | 2                  | 4                 | 4            | 0                  | 58.6                | 70.4        | 0.20                     |
|                       | S5 | (1,26)                             | (0,28)        | 2.2                | 15               | 16           | 1                  | 5                 | 4            | 1                  | 67.3                | 66.8        | 0.01                     |
| X<br>-10°             | S1 | (1,31)                             | (-1,27)       | 4.5                | 22               | 14           | 8                  | 4                 | 3            | 1                  | 53.0                | 55.6        | 0.05                     |
|                       | S2 | (-1,27)                            | (-1,28)       | 1.0                | 17               | 16           | 1                  | 5                 | 4            | 1                  | 40.5                | 46.7        | 0.15                     |
|                       | S3 | (1,27)                             | (-2,24)       | 4.2                | 15               | 9            | 6                  | 4                 | 4            | 0                  | 72.5                | 76.5        | 0.06                     |
|                       | S4 | (0,27)                             | (-1,26)       | 1.4                | 17               | 14           | 3                  | 4                 | 3            | 1                  | 63.5                | 61.2        | 0.04                     |
|                       | S5 | (0,27)                             | (0,28)        | 1.0                | 16               | 17           | 1                  | 5                 | 4            | 1                  | 73.4                | 70.6        | 0.04                     |
| X<br>-15°             | S1 | (0,30)                             | (-1,28)       | 2.2                | 14               | 13           | 1                  | 4                 | 4            | 0                  | 52.3                | 44.9        | 0.14                     |
|                       | S2 | (-4,29)                            | (-1,28)       | 3.2                | 9                | 17           | 8                  | 4                 | 5            | 1                  | 38.4                | 35.7        | 0.07                     |
|                       | S3 | (-1,28)                            | (-2,26)       | 2.2                | 18               | 14           | 4                  | 4                 | 4            | 0                  | 67.1                | 65.7        | 0.02                     |
|                       | S4 | (0,29)                             | (-1,27)       | 2.2                | 13               | 13           | 0                  | 4                 | 4            | 0                  | 51.5                | 49.8        | 0.03                     |
|                       | S5 | (-1,26)                            | (-1,30)       | 4.0                | 16               | 17           | 1                  | 5                 | 4            | 1                  | 68.0                | 67.7        | 0.00                     |
| Y<br>+10°             | S1 | (2,27)                             | (-1,29)       | 3.6                | 20               | 22           | 2                  | 6                 | 4            | 2                  | 44.7                | 47.7        | 0.07                     |
|                       | S2 | (-1,26)                            | (-1,27)       | 1.0                | 14               | 15           | 1                  | 4                 | 3            | 1                  | 39.8                | 43.0        | 0.08                     |
|                       | S3 | (0,27)                             | (-1,25)       | 2.2                | 16               | 12           | 4                  | 4                 | 4            | 0                  | 66.1                | 77.9        | 0.18                     |
|                       | S4 | (0,27)                             | (-1,27)       | 1.0                | 17               | 14           | 3                  | 4                 | 3            | 1                  | 60.2                | 64.6        | 0.07                     |
|                       | S5 | (0,28)                             | (0,29)        | 1.0                | 19               | 17           | 2                  | 4                 | 4            | 0                  | 59.3                | 63.8        | 0.08                     |
| Y<br>+15°             | S1 | (2,24)                             | (-1,32)       | 8.5                | 12               | 17           | 5                  | 5                 | 4            | 1                  | 38.3                | 38.4        | 0.00                     |
|                       | S2 | (-3,26)                            | (0,27)        | 3.2                | 12               | 14           | 2                  | 5                 | 4            | 1                  | 31.1                | 34.3        | 0.10                     |
|                       | S3 | (0,28)                             | (-1,28)       | 1.0                | 18               | 17           | 1                  | 4                 | 4            | 0                  | 62.4                | 68.3        | 0.09                     |
|                       | S4 | (0,27)                             | (-1,29)       | 2.2                | 15               | 15           | 0                  | 4                 | 3            | 1                  | 45.6                | 56.6        | 0.24                     |
|                       | S5 | (1,26)                             | (0,29)        | 3.2                | 12               | 19           | 7                  | 5                 | 4            | 1                  | 50.1                | 56.7        | 0.13                     |
| Y<br>-10°             | S1 | (2,27)                             | (0,33)        | 6.3                | 16               | 18           | 2                  | 4                 | 4            | 1                  | 50.6                | 42.2        | 0.17                     |
|                       | S2 | (0,30)                             | (-1,25)       | 5.1                | 21               | 12           | 9                  | 5                 | 3            | 2                  | 47.1                | 53.5        | 0.14                     |
|                       | S3 | (0,27)                             | (-1,27)       | 1.0                | 16               | 15           | 1                  | 4                 | 5            | 1                  | 70.8                | 67.2        | 0.05                     |
|                       | S4 | (0,28)                             | (-1,27)       | 1.4                | 17               | 15           | 2                  | 3                 | 4            | 1                  | 72.2                | 70.9        | 0.02                     |
|                       | S5 | (0,27)                             | (0,27)        | 0.0                | 17               | 14           | 3                  | 4                 | 3            | 1                  | 74.8                | 74.0        | 0.01                     |
| Y<br>-15°             | S1 | (2,28)                             | (1,31)        | 3.2                | 15               | 9            | 6                  | 4                 | 4            | 0                  | 45.9                | 36.4        | 0.21                     |
|                       | S2 | (0,30)                             | (-1,26)       | 4.1                | 21               | 15           | 6                  | 5                 | 4            | 1                  | 47.1                | 52.2        | 0.11                     |
|                       | S3 | (0,28)                             | (-1,28)       | 1.0                | 17               | 17           | 0                  | 4                 | 4            | 0                  | 68.0                | 62.7        | 0.08                     |
|                       | S4 | (0,29)                             | (-1,28)       | 1.4                | 19               | 15           | 4                  | 4                 | 3            | 1                  | 67.8                | 66.6        | 0.02                     |
|                       | S5 | (0,28)                             | (0,27)        | 1.0                | 19               | 13           | 6                  | 4                 | 3            | 1                  | 72.5                | 72.1        | 0.01                     |

**Table A2.** The detailed comparison data between the actual measurement and simulation results of ‘0.5mm grid’ in XZ-plane.

| Rotation/<br>Skull ID |    | XZ-plane acoustic pressure profile |               |                    |                  |              |                    |                   |              |                    |                     |             |                          |
|-----------------------|----|------------------------------------|---------------|--------------------|------------------|--------------|--------------------|-------------------|--------------|--------------------|---------------------|-------------|--------------------------|
|                       |    | Focal position                     |               |                    | Long axis length |              |                    | Short axis length |              |                    | Pressure peak ratio |             |                          |
|                       |    | Actual<br>(X,Z)                    | Sim.<br>(X,Z) | $\Delta_F$<br>(mm) | Actual<br>(mm)   | Sim.<br>(mm) | $\Delta_l$<br>(mm) | Actual<br>(mm)    | Sim.<br>(mm) | $\Delta_w$<br>(mm) | Actual<br>(%)       | Sim.<br>(%) | $\Delta_{PR}$<br>(Ratio) |
| Ref<br>0°             | S1 | (2,23)                             | (1,31)        | 8.1                | 8                | 23           | 15                 | 4                 | 4            | 0                  | 50.1                | 47.4        | 0.05                     |
|                       | S2 | (1,29)                             | (-1,28)       | 2.2                | 19               | 18           | 1                  | 4                 | 3            | 1                  | 56.9                | 52.9        | 0.07                     |
|                       | S3 | (0,27)                             | (0,27)        | 0.0                | 15               | 14           | 1                  | 4                 | 3            | 1                  | 69.4                | 71.5        | 0.03                     |
|                       | S4 | (0,27)                             | (-1,26)       | 1.4                | 17               | 13           | 4                  | 4                 | 3            | 1                  | 69.4                | 71.9        | 0.04                     |
|                       | S5 | (0,27)                             | (0,28)        | 1.0                | 16               | 14           | 2                  | 4                 | 3            | 1                  | 74.1                | 71.2        | 0.04                     |
| X<br>+10°             | S1 | (3,23)                             | (1,31)        | 8.2                | 7                | 13           | 6                  | 3                 | 5            | 2                  | 41.0                | 46.4        | 0.13                     |
|                       | S2 | (1,29)                             | (-1,26)       | 3.6                | 19               | 14           | 5                  | 3                 | 4            | 1                  | 63.3                | 55.2        | 0.13                     |
|                       | S3 | (0,27)                             | (0,29)        | 2.0                | 16               | 15           | 1                  | 4                 | 3            | 1                  | 68.5                | 68.4        | 0.00                     |
|                       | S4 | (0,27)                             | (-1,27)       | 1.0                | 15               | 14           | 1                  | 3                 | 3            | 0                  | 73.6                | 75.5        | 0.03                     |
|                       | S5 | (1,28)                             | (0,27)        | 1.4                | 18               | 16           | 2                  | 4                 | 3            | 1                  | 68.0                | 70.9        | 0.04                     |
| X<br>+15°             | S1 | (2,29)                             | (0,31)        | 2.8                | 20               | 21           | 1                  | 4                 | 4            | 0                  | 43.5                | 42.1        | 0.03                     |
|                       | S2 | (1,29)                             | (-1,25)       | 4.5                | 18               | 13           | 5                  | 4                 | 4            | 0                  | 61.7                | 57.2        | 0.07                     |
|                       | S3 | (-1,28)                            | (0,29)        | 1.4                | 18               | 13           | 5                  | 4                 | 3            | 1                  | 61.7                | 61.6        | 0.00                     |
|                       | S4 | (-1,27)                            | (-1,27)       | 0.0                | 16               | 16           | 0                  | 4                 | 3            | 1                  | 60.5                | 74.2        | 0.23                     |
|                       | S5 | (1,28)                             | (0,29)        | 1.4                | 20               | 15           | 5                  | 4                 | 3            | 1                  | 64.3                | 66.7        | 0.04                     |
| X<br>-10°             | S1 | (2,27)                             | (0,27)        | 2.0                | 18               | 15           | 3                  | 5                 | 4            | 1                  | 58.6                | 54.3        | 0.07                     |
|                       | S2 | (2,30)                             | (-1,28)       | 3.6                | 22               | 15           | 7                  | 3                 | 4            | 1                  | 42.1                | 47.1        | 0.12                     |
|                       | S3 | (-1,26)                            | (0,25)        | 1.4                | 14               | 11           | 3                  | 4                 | 3            | 1                  | 73.6                | 69.9        | 0.05                     |
|                       | S4 | (0,27)                             | (-1,27)       | 1.0                | 17               | 13           | 4                  | 4                 | 3            | 1                  | 63.5                | 62.6        | 0.01                     |
|                       | S5 | (1,27)                             | (0,28)        | 1.4                | 18               | 17           | 1                  | 4                 | 4            | 0                  | 73.0                | 70.6        | 0.03                     |
| X<br>-15°             | S1 | (2,27)                             | (0,28)        | 2.2                | 15               | 13           | 2                  | 5                 | 3            | 2                  | 56.7                | 44.4        | 0.22                     |
|                       | S2 | (2,36)                             | (0,29)        | 7.3                | 23               | 16           | 7                  | 4                 | 3            | 1                  | 33.4                | 35.7        | 0.07                     |
|                       | S3 | (-1,28)                            | (0,30)        | 2.2                | 18               | 13           | 5                  | 4                 | 3            | 1                  | 67.5                | 58.4        | 0.13                     |
|                       | S4 | (0,29)                             | (-1,27)       | 2.2                | 18               | 11           | 7                  | 4                 | 3            | 1                  | 51.1                | 51.7        | 0.01                     |
|                       | S5 | (1,29)                             | (0,31)        | 2.2                | 20               | 16           | 4                  | 4                 | 4            | 0                  | 64.5                | 67.7        | 0.05                     |
| Y<br>+10°             | S1 | (2,30)                             | (0,30)        | 2.0                | 23               | 22           | 1                  | 4                 | 4            | 0                  | 44.5                | 47.3        | 0.06                     |
|                       | S2 | (2,30)                             | (1,27)        | 3.2                | 18               | 15           | 3                  | 4                 | 3            | 1                  | 40.0                | 42.9        | 0.07                     |
|                       | S3 | (-1,27)                            | (0,26)        | 1.4                | 16               | 14           | 2                  | 4                 | 3            | 1                  | 71.8                | 74.8        | 0.04                     |
|                       | S4 | (0,28)                             | (-1,27)       | 1.4                | 17               | 14           | 3                  | 4                 | 3            | 1                  | 60.3                | 67.9        | 0.13                     |
|                       | S5 | (0,30)                             | (-1,28)       | 2.2                | 21               | 18           | 3                  | 4                 | 4            | 0                  | 59.1                | 63.8        | 0.08                     |
| Y<br>+15°             | S1 | (-4,22)                            | (-1,30)       | 8.5                | 6                | 21           | 15                 | 6                 | 5            | 1                  | 41.2                | 38.2        | 0.07                     |
|                       | S2 | (2,30)                             | (0,27)        | 3.6                | 20               | 15           | 5                  | 5                 | 4            | 1                  | 27.8                | 34.3        | 0.23                     |
|                       | S3 | (-1,29)                            | (0,29)        | 1.0                | 18               | 17           | 1                  | 5                 | 3            | 2                  | 62.4                | 68.3        | 0.09                     |
|                       | S4 | (1,28)                             | (-1,29)       | 2.2                | 15               | 15           | 0                  | 4                 | 3            | 1                  | 46.4                | 58.1        | 0.25                     |
|                       | S5 | (1,27)                             | (-1,28)       | 2.2                | 17               | 19           | 2                  | 5                 | 4            | 1                  | 50.4                | 56.7        | 0.13                     |
| Y<br>-10°             | S1 | (2,22)                             | (1,30)        | 8.1                | 6                | 16           | 10                 | 3                 | 4            | 1                  | 56.0                | 44.8        | 0.20                     |
|                       | S2 | (1,29)                             | (0,26)        | 3.2                | 20               | 13           | 7                  | 4                 | 4            | 0                  | 50.1                | 52.7        | 0.05                     |
|                       | S3 | (-1,27)                            | (0,28)        | 1.4                | 15               | 15           | 0                  | 4                 | 3            | 1                  | 71.3                | 65.0        | 0.09                     |
|                       | S4 | (0,28)                             | (-1,27)       | 1.4                | 18               | 15           | 3                  | 3                 | 3            | 0                  | 71.8                | 72.0        | 0.00                     |
|                       | S5 | (0,27)                             | (0,27)        | 0.0                | 17               | 14           | 3                  | 4                 | 4            | 0                  | 74.6                | 74.0        | 0.01                     |
| Y<br>-15°             | S1 | (2,27)                             | (2,29)        | 2.0                | 15               | 14           | 1                  | 4                 | 11           | 7                  | 44.3                | 39.7        | 0.10                     |
|                       | S2 | (1,29)                             | (0,26)        | 3.2                | 20               | 15           | 5                  | 4                 | 3            | 1                  | 49.2                | 51.7        | 0.05                     |
|                       | S3 | (0,28)                             | (0,28)        | 0.0                | 17               | 16           | 1                  | 4                 | 3            | 1                  | 68.3                | 59.8        | 0.12                     |
|                       | S4 | (0,29)                             | (-1,28)       | 1.4                | 19               | 15           | 4                  | 4                 | 4            | 0                  | 67.6                | 66.1        | 0.02                     |
|                       | S5 | (2,23)                             | (1,31)        | 8.1                | 8                | 23           | 15                 | 4                 | 4            | 0                  | 50.1                | 47.4        | 0.05                     |

**Table A3.** The detailed comparison data between the actual measurement and simulation results of ‘0.5mm grid’ in XY-plane.

| Rotation/<br>Skull ID |    | XY-plane acoustic pressure profile |               |                    |                  |              |                    |                   |              |                    |                     |             |                          |
|-----------------------|----|------------------------------------|---------------|--------------------|------------------|--------------|--------------------|-------------------|--------------|--------------------|---------------------|-------------|--------------------------|
|                       |    | Focal position                     |               |                    | Long axis length |              |                    | Short axis length |              |                    | Pressure peak ratio |             |                          |
|                       |    | Actual<br>(X,Y)                    | Sim.<br>(X,Y) | $\Delta_F$<br>(mm) | Actual<br>(mm)   | Sim.<br>(mm) | $\Delta_l$<br>(mm) | Actual<br>(mm)    | Sim.<br>(mm) | $\Delta_w$<br>(mm) | Actual<br>(%)       | Sim.<br>(%) | $\Delta_{PR}$<br>(Ratio) |
| Ref<br>0°             | S1 | (2,2)                              | (1,1)         | 1.4                | 4                | 4            | 0                  | 5                 | 4            | 1                  | 47.6                | 47.5        | 0.00                     |
|                       | S2 | (1,0)                              | (-1,-1)       | 2.2                | 5                | 4            | 1                  | 4                 | 3            | 1                  | 55.8                | 52.3        | 0.06                     |
|                       | S3 | (0,0)                              | (0,-1)        | 1.0                | 4                | 4            | 0                  | 4                 | 3            | 1                  | 68.5                | 69.3        | 0.01                     |
|                       | S4 | (0,0)                              | (-1,-1)       | 1.4                | 3                | 4            | 1                  | 4                 | 3            | 1                  | 69.4                | 68.7        | 0.01                     |
|                       | S5 | (0,1)                              | (0,0)         | 1.0                | 4                | 4            | 0                  | 4                 | 4            | 0                  | 72.7                | 69.6        | 0.04                     |
| X<br>+10°             | S1 | (3,4)                              | (1,1)         | 3.6                | 4                | 4            | 0                  | 4                 | 4            | 0                  | 46.1                | 46.7        | 0.01                     |
|                       | S2 | (1,0)                              | (-1,0)        | 2.0                | 5                | 4            | 1                  | 3                 | 4            | 1                  | 61.2                | 55.0        | 0.10                     |
|                       | S3 | (-1,1)                             | (0,0)         | 1.4                | 4                | 4            | 0                  | 4                 | 3            | 1                  | 67.5                | 68.0        | 0.01                     |
|                       | S4 | (0,0)                              | (-1,0)        | 1.0                | 4                | 3            | 1                  | 4                 | 3            | 1                  | 72.7                | 72.3        | 0.01                     |
|                       | S5 | (1,1)                              | (0,0)         | 1.4                | 4                | 3            | 1                  | 4                 | 4            | 0                  | 67.6                | 69.7        | 0.03                     |
| X<br>+15°             | S1 | (3,1)                              | (1,0)         | 2.2                | 6                | 4            | 2                  | 4                 | 4            | 0                  | 43.0                | 42.1        | 0.02                     |
|                       | S2 | (1,0)                              | (-1,0)        | 2.0                | 4                | 4            | 0                  | 3                 | 3            | 0                  | 61.4                | 53.0        | 0.14                     |
|                       | S3 | (-1,1)                             | (0,1)         | 1.0                | 4                | 5            | 1                  | 5                 | 3            | 2                  | 62.3                | 62.7        | 0.01                     |
|                       | S4 | (-1,0)                             | (-1,-1)       | 1.0                | 4                | 4            | 0                  | 4                 | 3            | 1                  | 60.5                | 72.2        | 0.19                     |
|                       | S5 | (0,1)                              | (0,0)         | 1.0                | 5                | 4            | 1                  | 4                 | 4            | 0                  | 64.0                | 65.8        | 0.03                     |
| X<br>-10°             | S1 | (2,1)                              | (0,-1)        | 2.8                | 4                | 3            | 1                  | 4                 | 3            | 1                  | 57.6                | 53.5        | 0.07                     |
|                       | S2 | (2,-1)                             | (-1,0)        | 3.2                | 6                | 4            | 2                  | 3                 | 4            | 1                  | 41.4                | 45.8        | 0.11                     |
|                       | S3 | (-1,1)                             | (0,-2)        | 3.2                | 4                | 5            | 1                  | 4                 | 3            | 1                  | 70.8                | 68.1        | 0.04                     |
|                       | S4 | (0,0)                              | (-1,-1)       | 1.4                | 5                | 4            | 1                  | 4                 | 3            | 1                  | 61.0                | 60.7        | 0.00                     |
|                       | S5 | (1,0)                              | (0,0)         | 1.0                | 4                | 4            | 0                  | 4                 | 4            | 0                  | 71.3                | 69.9        | 0.02                     |
| X<br>-15°             | S1 | (2,1)                              | (0,-1)        | 2.8                | 4                | 4            | 0                  | 4                 | 3            | 1                  | 56.0                | 43.7        | 0.22                     |
|                       | S2 | (1,-4)                             | (0,0)         | 4.1                | 4                | 4            | 0                  | 4                 | 3            | 1                  | 38.3                | 35.2        | 0.08                     |
|                       | S3 | (-1,-1)                            | (0,-2)        | 1.4                | 4                | 4            | 0                  | 3                 | 3            | 0                  | 66.1                | 62.7        | 0.05                     |
|                       | S4 | (1,1)                              | (-1,0)        | 2.2                | 4                | 4            | 0                  | 4                 | 3            | 1                  | 49.7                | 49.5        | 0.00                     |
|                       | S5 | (1,0)                              | (0,-1)        | 1.4                | 4                | 4            | 0                  | 4                 | 4            | 0                  | 64.0                | 67.7        | 0.06                     |
| Y<br>+10°             | S1 | (2,2)                              | (0,-1)        | 3.6                | 7                | 4            | 3                  | 4                 | 5            | 1                  | 44.0                | 46.6        | 0.06                     |
|                       | S2 | (2,-1)                             | (-1,-1)       | 3.0                | 4                | 4            | 0                  | 4                 | 4            | 0                  | 40.2                | 41.3        | 0.03                     |
|                       | S3 | (-1,0)                             | (0,-1)        | 1.4                | 4                | 5            | 1                  | 4                 | 3            | 1                  | 69.6                | 71.2        | 0.02                     |
|                       | S4 | (1,0)                              | (-1,-1)       | 2.2                | 4                | 4            | 0                  | 4                 | 4            | 0                  | 59.1                | 65.9        | 0.12                     |
|                       | S5 | (1,1)                              | (-1,0)        | 2.2                | 4                | 4            | 0                  | 4                 | 4            | 0                  | 58.4                | 62.8        | 0.08                     |
| Y<br>+15°             | S1 | (0,3)                              | (-1,-1)       | 4.1                | 5                | 4            | 1                  | 6                 | 3            | 3                  | 35.7                | 38.2        | 0.07                     |
|                       | S2 | (1,-3)                             | (0,0)         | 3.2                | 6                | 4            | 2                  | 6                 | 4            | 2                  | 30.3                | 33.1        | 0.09                     |
|                       | S3 | (-1,-1)                            | (0,0)         | 1.4                | 4                | 4            | 0                  | 4                 | 3            | 1                  | 62.3                | 67.7        | 0.09                     |
|                       | S4 | (1,0)                              | (-1,-1)       | 2.2                | 4                | 3            | 1                  | 3                 | 3            | 0                  | 45.9                | 58.4        | 0.27                     |
|                       | S5 | (1,1)                              | (0,0)         | 1.4                | 4                | 5            | 1                  | 4                 | 4            | 0                  | 49.7                | 56.6        | 0.14                     |
| Y<br>-10°             | S1 | (2,2)                              | (2,1)         | 1.0                | 4                | 4            | 0                  | 3                 | 4            | 1                  | 55.5                | 45.0        | 0.19                     |
|                       | S2 | (2,0)                              | (-1,-1)       | 3.2                | 5                | 4            | 1                  | 4                 | 4            | 0                  | 49.2                | 49.4        | 0.00                     |
|                       | S3 | (0,0)                              | (0,-1)        | 1.0                | 4                | 5            | 1                  | 4                 | 3            | 1                  | 69.0                | 64.7        | 0.06                     |
|                       | S4 | (0,0)                              | (-1,-1)       | 1.4                | 4                | 4            | 0                  | 4                 | 3            | 1                  | 70.4                | 70.0        | 0.01                     |
|                       | S5 | (0,0)                              | (0,0)         | 0.0                | 4                | 4            | 0                  | 4                 | 4            | 0                  | 72.0                | 72.6        | 0.01                     |
| Y<br>-15°             | S1 | (2,2)                              | (1,1)         | 1.4                | 3                | 4            | 1                  | 4                 | 3            | 1                  | 48.2                | 38.8        | 0.20                     |
|                       | S2 | (2,0)                              | (0,0)         | 2.0                | 4                | 4            | 0                  | 4                 | 3            | 1                  | 48.2                | 50.3        | 0.04                     |
|                       | S3 | (-1,0)                             | (0,-1)        | 1.4                | 4                | 3            | 1                  | 4                 | 3            | 1                  | 66.6                | 62.7        | 0.06                     |
|                       | S4 | (0,0)                              | (-1,-1)       | 1.4                | 4                | 4            | 0                  | 4                 | 4            | 0                  | 66.9                | 65.8        | 0.02                     |
|                       | S5 | (1,0)                              | (1,0)         | 0.0                | 4                | 5            | 1                  | 4                 | 4            | 0                  | 71.5                | 70.1        | 0.02                     |

**Table A4.** The detailed comparison of focal position with various resolution grids in the YZ-plane.

| Rotation/<br>Skull ID |               | YZ-plane acoustic pressure profile |               |                    |               |                    |               |                    |                 |                    |                 |                    |                 |     |
|-----------------------|---------------|------------------------------------|---------------|--------------------|---------------|--------------------|---------------|--------------------|-----------------|--------------------|-----------------|--------------------|-----------------|-----|
|                       |               | Focal position                     |               |                    |               |                    |               |                    |                 |                    |                 |                    |                 |     |
|                       |               | Actual<br>(Y,Z)                    | 0.5mm grid    |                    | 1.0mm grid    |                    | 2.0mm grid    |                    | 0.5&1.0mm grids |                    | 0.5&2.0mm grids |                    | 1.0&2.0mm grids |     |
|                       | Sim.<br>(Y,Z) | $\Delta_F$<br>(mm)                 | Sim.<br>(Y,Z) | $\Delta_F$<br>(mm) | Sim.<br>(Y,Z) | $\Delta_F$<br>(mm) | Sim.<br>(Y,Z) | $\Delta_F$<br>(mm) | Sim.<br>(Y,Z)   | $\Delta_F$<br>(mm) | Sim.<br>(Y,Z)   | $\Delta_F$<br>(mm) |                 |     |
| Ref<br>0°             | S3            | (0,27)                             | (-1,26)       | 1.4                | (-3,24)       | 4.2                | (-3,20)       | 7.6                | (-1,26)         | 1.4                | (-1,25)         | 2.2                | (-3,24)         | 4.2 |
|                       | S4            | (0,28)                             | (-1,26)       | 2.2                | (0,26)        | 2.0                | (0,20)        | 8.0                | (-1,26)         | 2.2                | (-1,26)         | 2.2                | (0,26)          | 2.0 |
|                       | S5            | (1,27)                             | (0,27)        | 1.0                | (0,27)        | 2.0                | (0,20)        | 7.1                | (1,28)          | 1.0                | (0,28)          | 1.4                | (0,27)          | 1.0 |
| X<br>+10°             | S3            | (0,27)                             | (1,28)        | 1.4                | (2,27)        | 2.0                | (-1,20)       | 7.1                | (0,27)          | 0.0                | (1,27)          | 1.0                | (2,27)          | 2.0 |
|                       | S4            | (-1,27)                            | (0,27)        | 1.0                | (1,29)        | 2.8                | (0,20)        | 7.1                | (0,28)          | 1.4                | (0,26)          | 1.4                | (1,29)          | 2.8 |
|                       | S5            | (1,27)                             | (0,27)        | 1.0                | (0,,27)       | 1.0                | (-2,20)       | 7.6                | (0,27)          | 1.0                | (0,28)          | 1.4                | (0,27)          | 1.0 |
| X<br>-10°             | S3            | (1,27)                             | (-2,24)       | 4.2                | (-3,24)       | 5.0                | (-6,20)       | 9.9                | (-2,23)         | 5.0                | (-2,24)         | 4.2                | (-3,24)         | 5.0 |
|                       | S4            | (0,27)                             | (-1,26)       | 1.4                | (-2,27)       | 2.0                | (-3,20)       | 7.6                | (-1,26)         | 1.4                | (-1,26)         | 1.4                | (-2,27)         | 2.0 |
|                       | S5            | (0,27)                             | (0,28)        | 1.0                | (-2,29)       | 2.8                | (-3,20)       | 7.6                | (0,28)          | 1.0                | (0,27)          | 0.0                | (-2,29)         | 2.8 |
| Y<br>+10°             | S3            | (0,27)                             | (-1,25)       | 2.2                | (-2,25)       | 2.8                | (-4,20)       | 8.1                | (-1,25)         | 2.2                | (-1,26)         | 1.4                | (-2,26)         | 2.2 |
|                       | S4            | (0,27)                             | (-1,27)       | 1.0                | (-1,28)       | 1.4                | (-1,20)       | 7.1                | (-1,27)         | 1.0                | (-1,26)         | 1.4                | (-1,28)         | 1.4 |
|                       | S5            | (0,28)                             | (0,29)        | 1.0                | (-1,30)       | 2.2                | (-3,21)       | 7.6                | (0,29)          | 1.0                | (0,29)          | 1.0                | (-1,30)         | 2.2 |
| Y<br>-10°             | S3            | (0,27)                             | (-1,27)       | 1.0                | (-2,26)       | 2.2                | (-5,20)       | 8.6                | (-1,26)         | 1.4                | (-1,27)         | 1.0                | (-2,26)         | 2.2 |
|                       | S4            | (0,28)                             | (-1,27)       | 1.4                | (-1,26)       | 2.2                | (-1,20)       | 8.1                | (-1,26)         | 2.2                | (-1,26)         | 2.2                | (-1,26)         | 2.2 |
|                       | S5            | (0,27)                             | (0,27)        | 0.0                | (-1,27)       | 1.0                | (-2,20)       | 7.3                | (0,26)          | 1.0                | (0,27)          | 0.0                | (-1,28)         | 1.4 |

**Table A5.** The detailed comparison of focal position with various resolution grids in the XZ-plane.

| Rotation/<br>Skull ID |               | XZ-plane acoustic pressure profile |               |                    |               |                    |               |                    |                 |                    |                 |                    |                 |     |
|-----------------------|---------------|------------------------------------|---------------|--------------------|---------------|--------------------|---------------|--------------------|-----------------|--------------------|-----------------|--------------------|-----------------|-----|
|                       |               | Focal position                     |               |                    |               |                    |               |                    |                 |                    |                 |                    |                 |     |
|                       |               | Actual<br>(X,Z)                    | 0.5mm grid    |                    | 1.0mm grid    |                    | 2.0mm grid    |                    | 0.5&1.0mm grids |                    | 0.5&2.0mm grids |                    | 1.0&2.0mm grids |     |
|                       | Sim.<br>(X,Z) | $\Delta_F$<br>(mm)                 | Sim.<br>(X,Z) | $\Delta_F$<br>(mm) | Sim.<br>(X,Z) | $\Delta_F$<br>(mm) | Sim.<br>(X,Z) | $\Delta_F$<br>(mm) | Sim.<br>(X,Z)   | $\Delta_F$<br>(mm) | Sim.<br>(X,Z)   | $\Delta_F$<br>(mm) |                 |     |
| Ref<br>0°             | S3            | (0,27)                             | (0,27)        | 0.0                | (0,27)        | 0.0                | (0,20)        | 7.0                | (0,27)          | 0.0                | (0,27)          | 0.0                | (0,28)          | 1.0 |
|                       | S4            | (0,27)                             | (-1,26)       | 1.4                | (-2,26)       | 2.2                | (-3,20)       | 7.6                | (-1,26)         | 1.4                | (-1,27)         | 1.0                | (-2,27)         | 2.0 |
|                       | S5            | (0,27)                             | (0,28)        | 1.0                | (1,27)        | 1.0                | (-2,20)       | 7.3                | (0,28)          | 1.0                | (0,28)          | 1.0                | (1,27)          | 1.0 |
| X<br>+10°             | S3            | (0,27)                             | (0,29)        | 2.0                | (0,29)        | 2.0                | (6,20)        | 9.2                | (0,29)          | 2.0                | (0,29)          | 2.0                | (0,29)          | 2.0 |
|                       | S4            | (0,27)                             | (-1,27)       | 1.0                | (-2,29)       | 2.8                | (-2,21)       | 6.3                | (-1,28)         | 1.4                | (-1,27)         | 1.0                | (-2,29)         | 2.8 |
|                       | S5            | (1,28)                             | (0,27)        | 1.4                | (0,27)        | 1.4                | (-5,20)       | 10.0               | (0,27)          | 1.4                | (0,28)          | 1.0                | (0,27)          | 1.4 |
| X<br>-10°             | S3            | (-1,26)                            | (0,25)        | 1.4                | (0,27)        | 1.4                | (-3,21)       | 5.4                | (0,26)          | 1.0                | (0,26)          | 1.0                | (0,27)          | 1.4 |
|                       | S4            | (0,27)                             | (-1,27)       | 1.0                | (-2,28)       | 2.2                | (-9,20)       | 11.4               | (-1,27)         | 1.0                | (-1,27)         | 1.0                | (-2,28)         | 2.2 |
|                       | S5            | (1,27)                             | (0,28)        | 1.4                | (0,29)        | 2.2                | (2,21)        | 6.1                | (0,28)          | 1.4                | (0,28)          | 1.4                | (0,29)          | 2.2 |
| Y<br>+10°             | S3            | (-1,27)                            | (0,26)        | 1.4                | (0,27)        | 1.0                | (1,20)        | 7.3                | (0,26)          | 1.4                | (0,26)          | 1.4                | (0,27)          | 1.0 |
|                       | S4            | (0,28)                             | (-1,27)       | 1.4                | (-2,29)       | 2.2                | (-3,21)       | 7.6                | (-1,27)         | 1.4                | (-1,27)         | 1.4                | (-2,29)         | 2.2 |
|                       | S5            | (0,30)                             | (-1,28)       | 2.2                | (-1,29)       | 1.4                | (0,20)        | 10.0               | (-1,28)         | 2.2                | (-1,29)         | 1.4                | (-1,29)         | 1.4 |
| Y<br>-10°             | S3            | (-1,27)                            | (0,28)        | 1.4                | (0,29)        | 2.2                | (-3,21)       | 6.3                | (0,27)          | 1.0                | (0,28)          | 1.4                | (0,29)          | 2.2 |
|                       | S4            | (0,28)                             | (-1,27)       | 1.4                | (-1,26)       | 2.2                | (-2,20)       | 8.2                | (-1,26)         | 2.2                | (-1,26)         | 2.2                | (-1,27)         | 1.4 |
|                       | S5            | (0,27)                             | (0,27)        | 0.0                | (1,27)        | 1.0                | (2,20)        | 7.3                | (0,27)          | 0.0                | (0,27)          | 0.0                | (1,26)          | 1.4 |

**Table A6.** The detailed comparison of focal position with various resolution grids in the XY-plane.

| Rotation/<br>Skull ID |                    | XY-plane acoustic pressure profile |               |                    |               |                    |               |                    |                 |                    |                 |                    |                 |                    |  |
|-----------------------|--------------------|------------------------------------|---------------|--------------------|---------------|--------------------|---------------|--------------------|-----------------|--------------------|-----------------|--------------------|-----------------|--------------------|--|
|                       |                    | Focal position                     |               |                    |               |                    |               |                    |                 |                    |                 |                    |                 |                    |  |
|                       |                    | Actual<br>(X,Y)                    | 0.5mm grid    |                    | 1.0mm grid    |                    | 2.0mm grid    |                    | 0.5&1.0mm grids |                    | 0.5&2.0mm grids |                    | 1.0&2.0mm grids |                    |  |
| Sim.<br>(X,Y)         | $\Delta_F$<br>(mm) |                                    | Sim.<br>(X,Y) | $\Delta_F$<br>(mm) | Sim.<br>(X,Y) | $\Delta_F$<br>(mm) | Sim.<br>(X,Y) | $\Delta_F$<br>(mm) | Sim.<br>(X,Y)   | $\Delta_F$<br>(mm) | Sim.<br>(X,Y)   | $\Delta_F$<br>(mm) | Sim.<br>(X,Y)   | $\Delta_F$<br>(mm) |  |
| Ref<br>0°             | S3                 | (0,0)                              | (0,-1)        | 1.0                | (0,-2)        | 2.0                | (1,-5)        | 5.1                | (0,-1)          | 1.0                | (0,-1)          | 1.0                | (0,-2)          | 2.0                |  |
|                       | S4                 | (0,0)                              | (-1,-1)       | 1.4                | (-2,0)        | 2.0                | (-7,1)        | 7.1                | (-1,-1)         | 1.4                | (-1,-1)         | 1.4                | (-2,-1)         | 2.2                |  |
|                       | S5                 | (0,1)                              | (0,0)         | 1.0                | (1,0)         | 1.4                | (10,-9)       | 14.1               | (1,0)           | 1.4                | (0,1)           | 0.0                | (1,0)           | 1.4                |  |
| X<br>+10°             | S3                 | (-1,1)                             | (0,0)         | 1.4                | (0,2)         | 1.4                | (1,2)         | 2.2                | (0,1)           | 1.0                | (0,1)           | 1.0                | (0,1)           | 1.0                |  |
|                       | S4                 | (0,0)                              | (-1,0)        | 1.0                | (-2,1)        | 2.2                | (-7,4)        | 8.1                | (-1,-1)         | 1.4                | (-1,0)          | 1.0                | (-2,1)          | 2.2                |  |
|                       | S5                 | (1,1)                              | (0,0)         | 1.4                | (0,0)         | 1.4                | (6,3)         | 5.4                | (0,0)           | 1.4                | (1,0)           | 1.0                | (0,0)           | 1.4                |  |
| X<br>-10°             | S3                 | (-1,1)                             | (0,-2)        | 3.2                | (0,-4)        | 5.1                | (-10,-10)     | 14.2               | (0,-2)          | 3.2                | (0,-2)          | 3.2                | (0,-4)          | 5.1                |  |
|                       | S4                 | (0,0)                              | (-1,-1)       | 1.4                | (-2,-1)       | 2.2                | (-4,-6)       | 7.2                | (-1,-1)         | 1.4                | (-1,-1)         | 1.4                | (-2,-2)         | 2.8                |  |
|                       | S5                 | (1,0)                              | (0,0)         | 1.0                | (0,-2)        | 2.2                | (8,-9)        | 11.4               | (0,0)           | 1.0                | (1,0)           | 0.0                | (0,-2)          | 2.2                |  |
| Y<br>+10°             | S3                 | (-1,0)                             | (0,-1)        | 1.4                | (0,-2)        | 2.2                | (-9,-9)       | 12.0               | (0,-1)          | 1.4                | (0,-2)          | 2.2                | (0,-2)          | 2.2                |  |
|                       | S4                 | (1,0)                              | (-1,-1)       | 2.2                | (-2,-1)       | 3.2                | (-6,3)        | 7.6                | (-1,-1)         | 2.2                | (-2,-1)         | 3.2                | (-2,-1)         | 3.2                |  |
|                       | S5                 | (1,1)                              | (-1,0)        | 2.2                | (-1,-1)       | 2.8                | (-5,-6)       | 9.2                | (0,-1)          | 2.2                | (-1,0)          | 2.2                | (-1,-1)         | 2.8                |  |
| Y<br>-10°             | S3                 | (0,0)                              | (0,-1)        | 1.0                | (1,-2)        | 2.2                | (8,-8)        | 11.3               | (0,-1)          | 1.0                | (0,-1)          | 1.0                | (1,-2)          | 2.2                |  |
|                       | S4                 | (0,0)                              | (-1,-1)       | 1.4                | (-1,-1)       | 1.4                | (-2,5)        | 5.4                | (-1,-1)         | 1.4                | (-1,-1)         | 1.4                | (-1,-1)         | 1.4                |  |
|                       | S5                 | (0,0)                              | (0,0)         | 0.0                | (1,-1)        | 1.4                | (9,-9)        | 12.7               | (0,1)           | 1.0                | (1,0)           | 1.0                | (1,-1)          | 1.4                |  |

**Table A7.** The detailed comparison of long axis length with various resolution grids in the YZ-plane.

| Rotation/<br>Skull ID |            | YZ-plane acoustic pressure profile |            |            |            |            |            |            |                 |            |                 |            |                 |            |  |
|-----------------------|------------|------------------------------------|------------|------------|------------|------------|------------|------------|-----------------|------------|-----------------|------------|-----------------|------------|--|
|                       |            | Long axis length (mm)              |            |            |            |            |            |            |                 |            |                 |            |                 |            |  |
|                       |            | Actual                             | 0.5mm grid |            | 1.0mm grid |            | 2.0mm grid |            | 0.5&1.0mm grids |            | 0.5&2.0mm grids |            | 1.0&2.0mm grids |            |  |
| Sim.                  | $\Delta_F$ |                                    | Sim.       | $\Delta_F$ | Sim.       | $\Delta_F$ | Sim.       | $\Delta_F$ | Sim.            | $\Delta_F$ | Sim.            | $\Delta_F$ | Sim.            | $\Delta_F$ |  |
| Ref<br>0°             | S3         | 15                                 | 14         | 1          | 9          | 6          | 1          | 14         | 14              | 1          | 13              | 2          | 10              | 5          |  |
|                       | S4         | 17                                 | 13         | 4          | 14         | 3          | 1          | 16         | 13              | 4          | 13              | 4          | 15              | 2          |  |
|                       | S5         | 16                                 | 14         | 2          | 16         | 0          | 1          | 15         | 16              | 0          | 16              | 0          | 16              | 0          |  |
| X<br>+10°             | S3         | 16                                 | 16         | 0          | 16         | 0          | 2          | 14         | 14              | 2          | 12              | 4          | 16              | 0          |  |
|                       | S4         | 15                                 | 14         | 1          | 19         | 4          | 2          | 13         | 15              | 0          | 14              | 1          | 19              | 4          |  |
|                       | S5         | 16                                 | 16         | 0          | 15         | 1          | 1          | 15         | 16              | 0          | 18              | 2          | 17              | 1          |  |
| X<br>-10°             | S3         | 15                                 | 9          | 6          | 9          | 6          | 1          | 14         | 8               | 7          | 10              | 5          | 10              | 5          |  |
|                       | S4         | 17                                 | 14         | 3          | 16         | 1          | 2          | 15         | 14              | 3          | 14              | 3          | 16              | 1          |  |
|                       | S5         | 16                                 | 17         | 1          | 19         | 3          | 2          | 14         | 16              | 0          | 16              | 0          | 19              | 3          |  |
| Y<br>+10°             | S3         | 16                                 | 12         | 4          | 13         | 3          | 2          | 14         | 12              | 4          | 14              | 2          | 14              | 2          |  |
|                       | S4         | 17                                 | 14         | 3          | 15         | 2          | 2          | 15         | 15              | 2          | 12              | 5          | 16              | 1          |  |
|                       | S5         | 19                                 | 17         | 2          | 21         | 2          | 4          | 15         | 20              | 1          | 20              | 1          | 21              | 2          |  |
| Y<br>-10°             | S3         | 16                                 | 15         | 1          | 14         | 2          | 3          | 13         | 14              | 2          | 16              | 0          | 16              | 0          |  |
|                       | S4         | 17                                 | 15         | 2          | 14         | 3          | 1          | 16         | 15              | 2          | 13              | 4          | 14              | 3          |  |
|                       | S5         | 17                                 | 14         | 3          | 16         | 1          | 1          | 16         | 14              | 3          | 15              | 2          | 18              | 1          |  |

**Table A8.** The detailed comparison of long axis length with various resolution grids in the XZ-plane.

| Rotation/<br>Skull ID |            | XZ-plane acoustic pressure profile |            |            |            |            |            |            |                 |            |                 |            |                 |   |
|-----------------------|------------|------------------------------------|------------|------------|------------|------------|------------|------------|-----------------|------------|-----------------|------------|-----------------|---|
|                       |            | Long axis length (mm)              |            |            |            |            |            |            |                 |            |                 |            |                 |   |
|                       |            | Actual                             | 0.5mm grid |            | 1.0mm grid |            | 2.0mm grid |            | 0.5&1.0mm grids |            | 0.5&2.0mm grids |            | 1.0&2.0mm grids |   |
| Sim.                  | $\Delta_F$ |                                    | Sim.       | $\Delta_F$ | Sim.       | $\Delta_F$ | Sim.       | $\Delta_F$ | Sim.            | $\Delta_F$ | Sim.            | $\Delta_F$ |                 |   |
| Ref<br>0°             | S3         | 15                                 | 14         | 1          | 14         | 1          | 2          | 13         | 14              | 1          | 14              | 1          | 15              | 0 |
|                       | S4         | 17                                 | 13         | 4          | 15         | 2          | 1          | 16         | 13              | 4          | 13              | 4          | 16              | 1 |
|                       | S5         | 16                                 | 14         | 2          | 16         | 0          | 1          | 15         | 15              | 1          | 17              | 1          | 17              | 1 |
| X<br>+10°             | S3         | 16                                 | 15         | 1          | 15         | 1          | 2          | 14         | 15              | 1          | 11              | 5          | 14              | 2 |
|                       | S4         | 15                                 | 14         | 1          | 17         | 2          | 4          | 11         | 16              | 1          | 15              | 0          | 19              | 4 |
|                       | S5         | 18                                 | 16         | 2          | 15         | 3          | 2          | 16         | 16              | 2          | 17              | 1          | 17              | 1 |
| X<br>-10°             | S3         | 14                                 | 11         | 3          | 16         | 2          | 3          | 11         | 15              | 1          | 14              | 0          | 16              | 2 |
|                       | S4         | 17                                 | 13         | 4          | 15         | 2          | 1          | 16         | 13              | 4          | 12              | 5          | 14              | 3 |
|                       | S5         | 18                                 | 17         | 1          | 16         | 2          | 2          | 16         | 16              | 2          | 16              | 2          | 18              | 0 |
| Y<br>+10°             | S3         | 16                                 | 14         | 2          | 15         | 1          | 2          | 14         | 13              | 3          | 14              | 2          | 16              | 0 |
|                       | S4         | 17                                 | 14         | 3          | 19         | 2          | 3          | 14         | 14              | 3          | 10              | 7          | 17              | 0 |
|                       | S5         | 21                                 | 18         | 3          | 19         | 2          | 2          | 19         | 18              | 3          | 20              | 1          | 20              | 1 |
| Y<br>-10°             | S3         | 15                                 | 15         | 0          | 17         | 2          | 3          | 12         | 13              | 2          | 17              | 2          | 16              | 1 |
|                       | S4         | 18                                 | 15         | 3          | 14         | 4          | 2          | 16         | 14              | 4          | 13              | 5          | 14              | 4 |
|                       | S5         | 17                                 | 14         | 3          | 15         | 2          | 2          | 15         | 14              | 3          | 13              | 4          | 14              | 3 |

**Table A9.** The detailed comparison of long axis length with various resolution grids in the XY-plane.

| Rotation/<br>Skull ID |            | XY-plane acoustic pressure profile |            |            |            |            |            |            |                 |            |                 |            |                 |   |
|-----------------------|------------|------------------------------------|------------|------------|------------|------------|------------|------------|-----------------|------------|-----------------|------------|-----------------|---|
|                       |            | Long axis length (mm)              |            |            |            |            |            |            |                 |            |                 |            |                 |   |
|                       |            | Actual                             | 0.5mm grid |            | 1.0mm grid |            | 2.0mm grid |            | 0.5&1.0mm grids |            | 0.5&2.0mm grids |            | 1.0&2.0mm grids |   |
| Sim.                  | $\Delta_F$ |                                    | Sim.       | $\Delta_F$ | Sim.       | $\Delta_F$ | Sim.       | $\Delta_F$ | Sim.            | $\Delta_F$ | Sim.            | $\Delta_F$ |                 |   |
| Ref<br>0°             | S3         | 4                                  | 4          | 0          | 5          | 1          | 8          | 4          | 4               | 0          | 4               | 0          | 5               | 1 |
|                       | S4         | 3                                  | 4          | 1          | 4          | 1          | 21         | 18         | 4               | 1          | 4               | 1          | 4               | 1 |
|                       | S5         | 4                                  | 4          | 0          | 5          | 1          | 3          | 1          | 4               | 0          | 4               | 0          | 5               | 1 |
| X<br>+10°             | S3         | 4                                  | 4          | 0          | 6          | 2          | 9          | 5          | 4               | 0          | 4               | 0          | 6               | 2 |
|                       | S4         | 4                                  | 3          | 1          | 4          | 0          | 3          | 1          | 4               | 0          | 4               | 0          | 5               | 1 |
|                       | S5         | 4                                  | 3          | 1          | 5          | 1          | 8          | 4          | 5               | 1          | 5               | 1          | 5               | 1 |
| X<br>-10°             | S3         | 4                                  | 5          | 1          | 4          | 0          | 1          | 3          | 5               | 1          | 4               | 0          | 4               | 0 |
|                       | S4         | 5                                  | 4          | 1          | 4          | 1          | 8          | 3          | 4               | 1          | 3               | 2          | 4               | 1 |
|                       | S5         | 4                                  | 4          | 0          | 4          | 0          | 4          | 0          | 4               | 0          | 5               | 1          | 4               | 0 |
| Y<br>+10°             | S3         | 4                                  | 5          | 1          | 5          | 1          | 4          | 0          | 4               | 0          | 4               | 0          | 5               | 1 |
|                       | S4         | 4                                  | 4          | 0          | 4          | 0          | 5          | 1          | 4               | 0          | 4               | 0          | 4               | 0 |
|                       | S5         | 4                                  | 4          | 0          | 5          | 1          | 7          | 3          | 4               | 0          | 5               | 1          | 5               | 1 |
| Y<br>-10°             | S3         | 4                                  | 5          | 1          | 6          | 2          | 5          | 1          | 4               | 0          | 4               | 0          | 5               | 1 |
|                       | S4         | 4                                  | 4          | 0          | 5          | 1          | 11         | 7          | 4               | 0          | 4               | 0          | 5               | 1 |
|                       | S5         | 4                                  | 4          | 0          | 4          | 0          | 3          | 1          | 4               | 0          | 4               | 0          | 5               | 1 |

**Table A10.** The detailed comparison of short axis length with various resolution grids in the YZ-plane.

| Rotation/<br>Skull ID |            | YZ-plane acoustic pressure profile |            |            |            |            |            |            |                 |            |                 |            |                 |   |
|-----------------------|------------|------------------------------------|------------|------------|------------|------------|------------|------------|-----------------|------------|-----------------|------------|-----------------|---|
|                       |            | Short axis length (mm)             |            |            |            |            |            |            |                 |            |                 |            |                 |   |
|                       |            | Actual                             | 0.5mm grid |            | 1.0mm grid |            | 2.0mm grid |            | 0.5&1.0mm grids |            | 0.5&2.0mm grids |            | 1.0&2.0mm grids |   |
| Sim.                  | $\Delta_F$ |                                    | Sim.       | $\Delta_F$ | Sim.       | $\Delta_F$ | Sim.       | $\Delta_F$ | Sim.            | $\Delta_F$ | Sim.            | $\Delta_F$ |                 |   |
| Ref<br>0°             | S3         | 4                                  | 5          | 1          | 4          | 0          | 4          | 0          | 5               | 1          | 5               | 1          | 4               | 0 |
|                       | S4         | 3                                  | 4          | 1          | 4          | 1          | 3          | 0          | 4               | 1          | 4               | 1          | 4               | 1 |
|                       | S5         | 4                                  | 4          | 0          | 5          | 1          | 3          | 1          | 4               | 0          | 4               | 0          | 4               | 0 |
| X<br>+10°             | S3         | 4                                  | 5          | 1          | 6          | 2          | 5          | 1          | 4               | 0          | 5               | 1          | 6               | 2 |
|                       | S4         | 4                                  | 3          | 1          | 4          | 0          | 3          | 1          | 3               | 1          | 3               | 1          | 4               | 0 |
|                       | S5         | 4                                  | 5          | 1          | 5          | 1          | 3          | 1          | 3               | 1          | 3               | 1          | 5               | 1 |
| X<br>-10°             | S3         | 4                                  | 4          | 0          | 3          | 1          | 5          | 1          | 3               | 1          | 4               | 0          | 4               | 0 |
|                       | S4         | 4                                  | 3          | 1          | 4          | 0          | 4          | 0          | 3               | 1          | 3               | 1          | 4               | 0 |
|                       | S5         | 5                                  | 4          | 1          | 4          | 1          | 5          | 0          | 3               | 2          | 3               | 2          | 4               | 1 |
| Y<br>+10°             | S3         | 4                                  | 4          | 0          | 5          | 1          | 10         | 6          | 4               | 0          | 4               | 0          | 5               | 1 |
|                       | S4         | 4                                  | 3          | 1          | 3          | 1          | 3          | 1          | 4               | 0          | 3               | 1          | 4               | 0 |
|                       | S5         | 4                                  | 4          | 0          | 5          | 1          | 5          | 1          | 4               | 0          | 4               | 0          | 5               | 1 |
| Y<br>-10°             | S3         | 4                                  | 5          | 1          | 4          | 0          | 15         | 11         | 4               | 0          | 4               | 0          | 4               | 0 |
|                       | S4         | 3                                  | 4          | 1          | 4          | 1          | 3          | 0          | 4               | 1          | 3               | 0          | 4               | 1 |
|                       | S5         | 4                                  | 3          | 1          | 5          | 1          | 5          | 1          | 4               | 0          | 3               | 1          | 5               | 1 |

**Table A11.** The detailed comparison of short axis length with various resolution grids in the XZ-plane.

| Rotation/<br>Skull ID |            | XZ-plane acoustic pressure profile |            |            |            |            |            |            |                 |            |                 |            |                 |   |
|-----------------------|------------|------------------------------------|------------|------------|------------|------------|------------|------------|-----------------|------------|-----------------|------------|-----------------|---|
|                       |            | Short axis length (mm)             |            |            |            |            |            |            |                 |            |                 |            |                 |   |
|                       |            | Actual                             | 0.5mm grid |            | 1.0mm grid |            | 2.0mm grid |            | 0.5&1.0mm grids |            | 0.5&2.0mm grids |            | 1.0&2.0mm grids |   |
| Sim.                  | $\Delta_F$ |                                    | Sim.       | $\Delta_F$ | Sim.       | $\Delta_F$ | Sim.       | $\Delta_F$ | Sim.            | $\Delta_F$ | Sim.            | $\Delta_F$ |                 |   |
| Ref<br>0°             | S3         | 4                                  | 3          | 1          | 3          | 1          | 7          | 3          | 3               | 1          | 3               | 1          | 3               | 1 |
|                       | S4         | 4                                  | 3          | 1          | 4          | 0          | 4          | 0          | 3               | 1          | 3               | 1          | 4               | 0 |
|                       | S5         | 4                                  | 3          | 1          | 4          | 0          | 3          | 1          | 3               | 1          | 3               | 1          | 4               | 0 |
| X<br>+10°             | S3         | 4                                  | 3          | 1          | 4          | 0          | 3          | 1          | 3               | 1          | 3               | 1          | 3               | 1 |
|                       | S4         | 3                                  | 3          | 0          | 4          | 1          | 4          | 1          | 3               | 0          | 3               | 0          | 4               | 1 |
|                       | S5         | 4                                  | 3          | 1          | 4          | 0          | 6          | 2          | 3               | 1          | 3               | 1          | 4               | 0 |
| X<br>-10°             | S3         | 4                                  | 3          | 1          | 3          | 1          | 4          | 0          | 3               | 1          | 3               | 1          | 3               | 1 |
|                       | S4         | 4                                  | 3          | 1          | 4          | 0          | 3          | 1          | 3               | 1          | 3               | 1          | 4               | 0 |
|                       | S5         | 4                                  | 4          | 0          | 4          | 0          | 1          | 3          | 4               | 0          | 4               | 0          | 4               | 0 |
| Y<br>+10°             | S3         | 4                                  | 3          | 1          | 3          | 1          | 3          | 1          | 3               | 1          | 3               | 1          | 3               | 1 |
|                       | S4         | 4                                  | 3          | 1          | 4          | 0          | 4          | 0          | 3               | 1          | 3               | 1          | 4               | 0 |
|                       | S5         | 4                                  | 4          | 0          | 4          | 0          | 5          | 1          | 4               | 0          | 5               | 1          | 4               | 0 |
| Y<br>-10°             | S3         | 4                                  | 3          | 1          | 4          | 0          | 8          | 4          | 3               | 1          | 3               | 1          | 4               | 0 |
|                       | S4         | 3                                  | 3          | 0          | 3          | 0          | 5          | 2          | 3               | 0          | 3               | 0          | 4               | 1 |
|                       | S5         | 4                                  | 4          | 0          | 4          | 0          | 4          | 0          | 4               | 0          | 4               | 0          | 4               | 0 |

**Table A12.** The detailed comparison of short axis length with various resolution grids in the XY-plane.

| Rotation/<br>Skull ID |            | XY-plane acoustic pressure profile |            |            |            |            |            |            |                 |            |                 |            |                 |   |
|-----------------------|------------|------------------------------------|------------|------------|------------|------------|------------|------------|-----------------|------------|-----------------|------------|-----------------|---|
|                       |            | Short axis length (mm)             |            |            |            |            |            |            |                 |            |                 |            |                 |   |
|                       |            | Actual                             | 0.5mm grid |            | 1.0mm grid |            | 2.0mm grid |            | 0.5&1.0mm grids |            | 0.5&2.0mm grids |            | 1.0&2.0mm grids |   |
| Sim.                  | $\Delta_F$ |                                    | Sim.       | $\Delta_F$ | Sim.       | $\Delta_F$ | Sim.       | $\Delta_F$ | Sim.            | $\Delta_F$ | Sim.            | $\Delta_F$ |                 |   |
| Ref<br>0°             | S3         | 4                                  | 3          | 1          | 4          | 0          | 13         | 9          | 3               | 1          | 3               | 1          | 4               | 0 |
|                       | S4         | 4                                  | 3          | 1          | 4          | 0          | 9          | 5          | 3               | 1          | 3               | 1          | 4               | 0 |
|                       | S5         | 4                                  | 4          | 0          | 5          | 1          | 1          | 3          | 4               | 0          | 4               | 0          | 5               | 1 |
| X<br>+10°             | S3         | 4                                  | 3          | 1          | 4          | 0          | 21         | 17         | 3               | 1          | 3               | 1          | 4               | 0 |
|                       | S4         | 4                                  | 3          | 1          | 3          | 1          | 4          | 0          | 3               | 1          | 3               | 1          | 4               | 0 |
|                       | S5         | 4                                  | 4          | 0          | 4          | 0          | 9          | 5          | 4               | 0          | 4               | 0          | 4               | 0 |
| X<br>-10°             | S3         | 4                                  | 3          | 1          | 4          | 0          | 2          | 2          | 3               | 1          | 3               | 1          | 4               | 0 |
|                       | S4         | 4                                  | 3          | 1          | 4          | 0          | 9          | 5          | 3               | 1          | 4               | 0          | 4               | 0 |
|                       | S5         | 4                                  | 4          | 0          | 4          | 0          | 4          | 0          | 4               | 0          | 4               | 0          | 4               | 0 |
| Y<br>+10°             | S3         | 4                                  | 3          | 1          | 3          | 1          | 3          | 1          | 3               | 1          | 3               | 1          | 3               | 1 |
|                       | S4         | 4                                  | 4          | 0          | 4          | 0          | 4          | 0          | 3               | 1          | 4               | 0          | 4               | 0 |
|                       | S5         | 4                                  | 4          | 0          | 4          | 0          | 6          | 2          | 4               | 0          | 4               | 0          | 4               | 0 |
| Y<br>-10°             | S3         | 4                                  | 3          | 1          | 4          | 0          | 5          | 1          | 3               | 1          | 4               | 0          | 4               | 0 |
|                       | S4         | 4                                  | 3          | 1          | 5          | 1          | 20         | 16         | 3               | 1          | 3               | 1          | 5               | 1 |
|                       | S5         | 4                                  | 4          | 0          | 5          | 1          | 3          | 1          | 4               | 0          | 4               | 0          | 5               | 1 |

**Table A13.** The detailed comparison of pressure peak ratio with various resolution grids in the YZ-plane.

| Rotation/<br>Skull ID |                       | YZ-plane acoustic pressure profile |             |                       |             |                       |             |                       |                 |                       |                 |                       |                 |      |
|-----------------------|-----------------------|------------------------------------|-------------|-----------------------|-------------|-----------------------|-------------|-----------------------|-----------------|-----------------------|-----------------|-----------------------|-----------------|------|
|                       |                       | Pressure peak ratio                |             |                       |             |                       |             |                       |                 |                       |                 |                       |                 |      |
|                       |                       | Actual<br>(%)                      | 0.5mm grid  |                       | 1.0mm grid  |                       | 2.0mm grid  |                       | 0.5&1.0mm grids |                       | 0.5&2.0mm grids |                       | 1.0&2.0mm grids |      |
| Sim.<br>(%)           | $\Delta_F$<br>(Ratio) |                                    | Sim.<br>(%) | $\Delta_F$<br>(Ratio) | Sim.<br>(%) | $\Delta_F$<br>(Ratio) | Sim.<br>(%) | $\Delta_F$<br>(Ratio) | Sim.<br>(%)     | $\Delta_F$<br>(Ratio) | Sim.<br>(%)     | $\Delta_F$<br>(Ratio) |                 |      |
| Ref<br>0°             | S3                    | 67.5                               | 73.2        | 0.08                  | 77.8        | 0.15                  | 55.8        | 0.17                  | 73.2            | 0.08                  | 72.2            | 0.07                  | 77.7            | 0.15 |
|                       | S4                    | 68.3                               | 69.7        | 0.02                  | 67.8        | 0.01                  | 49.3        | 0.28                  | 69.0            | 0.01                  | 66.7            | 0.02                  | 65.6            | 0.04 |
|                       | S5                    | 73.6                               | 71.2        | 0.03                  | 70.8        | 0.04                  | 55.3        | 0.25                  | 70.6            | 0.04                  | 68.4            | 0.07                  | 68.1            | 0.07 |
| X<br>+10°             | S3                    | 67.5                               | 68.5        | 0.01                  | 68.9        | 0.02                  | 46.3        | 0.31                  | 69.5            | 0.03                  | 69.8            | 0.03                  | 68.2            | 0.01 |
|                       | S4                    | 73.9                               | 71.8        | 0.03                  | 64.0        | 0.13                  | 66.1        | 0.11                  | 71.2            | 0.04                  | 70.3            | 0.05                  | 63.2            | 0.14 |
|                       | S5                    | 69.6                               | 70.9        | 0.02                  | 71.0        | 0.02                  | 48.6        | 0.30                  | 72.0            | 0.03                  | 68.1            | 0.02                  | 68.7            | 0.01 |
| X<br>-10°             | S3                    | 72.5                               | 76.5        | 0.06                  | 82.7        | 0.14                  | 60.3        | 0.17                  | 80.6            | 0.11                  | 75.4            | 0.04                  | 77.2            | 0.06 |
|                       | S4                    | 63.5                               | 61.2        | 0.04                  | 56.0        | 0.12                  | 40.1        | 0.37                  | 60.7            | 0.04                  | 58.8            | 0.07                  | 55.0            | 0.13 |
|                       | S5                    | 73.4                               | 70.6        | 0.04                  | 68.6        | 0.07                  | 59.8        | 0.19                  | 70.7            | 0.04                  | 69.4            | 0.05                  | 67.3            | 0.08 |
| Y<br>+10°             | S3                    | 66.1                               | 77.9        | 0.18                  | 75.8        | 0.15                  | 56.5        | 0.15                  | 78.1            | 0.18                  | 73.3            | 0.11                  | 73.1            | 0.11 |
|                       | S4                    | 60.2                               | 64.6        | 0.07                  | 57.1        | 0.05                  | 53.3        | 0.11                  | 63.7            | 0.06                  | 63.8            | 0.06                  | 55.3            | 0.08 |
|                       | S5                    | 59.3                               | 63.8        | 0.08                  | 61.1        | 0.03                  | 51.2        | 0.14                  | 62.3            | 0.05                  | 61.5            | 0.04                  | 59.9            | 0.01 |
| Y<br>-10°             | S3                    | 70.8                               | 67.2        | 0.05                  | 68.2        | 0.04                  | 41.4        | 0.42                  | 67.6            | 0.05                  | 64.7            | 0.09                  | 67.2            | 0.05 |
|                       | S4                    | 72.2                               | 70.9        | 0.02                  | 73.0        | 0.01                  | 48.2        | 0.33                  | 70.7            | 0.02                  | 70.4            | 0.02                  | 71.0            | 0.02 |
|                       | S5                    | 74.8                               | 74.0        | 0.01                  | 71.8        | 0.04                  | 46.9        | 0.37                  | 72.8            | 0.03                  | 71.2            | 0.05                  | 68.9            | 0.08 |



**Table A14.** The detailed comparison of pressure peak ratio with various resolution grids in the XZ-plane.

| Rotation/<br>Skull ID |                    | XZ-plane acoustic pressure profile |            |                    |            |                    |            |                    |                 |                    |                 |                    |                 |      |
|-----------------------|--------------------|------------------------------------|------------|--------------------|------------|--------------------|------------|--------------------|-----------------|--------------------|-----------------|--------------------|-----------------|------|
|                       |                    | Pressure peak ratio                |            |                    |            |                    |            |                    |                 |                    |                 |                    |                 |      |
|                       |                    | Actual (%)                         | 0.5mm grid |                    | 1.0mm grid |                    | 2.0mm grid |                    | 0.5&1.0mm grids |                    | 0.5&2.0mm grids |                    | 1.0&2.0mm grids |      |
| Sim. (%)              | $\Delta_F$ (Ratio) |                                    | Sim. (%)   | $\Delta_F$ (Ratio) | Sim. (%)   | $\Delta_F$ (Ratio) | Sim. (%)   | $\Delta_F$ (Ratio) | Sim. (%)        | $\Delta_F$ (Ratio) | Sim. (%)        | $\Delta_F$ (Ratio) |                 |      |
| Ref<br>0°             | S3                 | 69.4                               | 71.5       | 0.03               | 64.3       | 0.07               | 42.0       | 0.39               | 71.8            | 0.03               | 69.4            | 0.00               | 63.3            | 0.09 |
|                       | S4                 | 69.4                               | 71.9       | 0.04               | 72.4       | 0.04               | 59.5       | 0.14               | 71.0            | 0.02               | 68.4            | 0.01               | 70.1            | 0.01 |
|                       | S5                 | 74.1                               | 71.2       | 0.04               | 72.1       | 0.03               | 66.7       | 0.10               | 70.6            | 0.05               | 67.6            | 0.09               | 70.2            | 0.05 |
| X<br>+10°             | S3                 | 68.5                               | 68.4       | 0.00               | 66.0       | 0.04               | 51.3       | 0.25               | 68.5            | 0.00               | 69.8            | 0.02               | 66.2            | 0.03 |
|                       | S4                 | 73.6                               | 75.5       | 0.03               | 70.4       | 0.04               | 70.3       | 0.04               | 74.2            | 0.01               | 71.6            | 0.03               | 68.2            | 0.07 |
|                       | S5                 | 68.0                               | 70.9       | 0.04               | 71.0       | 0.04               | 56.9       | 0.16               | 72.0            | 0.06               | 69.0            | 0.01               | 68.8            | 0.01 |
| X<br>-10°             | S3                 | 73.6                               | 69.9       | 0.05               | 59.0       | 0.20               | 57.8       | 0.21               | 67.8            | 0.08               | 65.9            | 0.10               | 57.5            | 0.22 |
|                       | S4                 | 63.5                               | 62.6       | 0.01               | 55.7       | 0.12               | 51.9       | 0.18               | 61.9            | 0.03               | 60.5            | 0.05               | 54.9            | 0.14 |
|                       | S5                 | 73.0                               | 70.6       | 0.03               | 65.7       | 0.10               | 76.1       | 0.04               | 70.7            | 0.03               | 69.4            | 0.05               | 64.0            | 0.12 |
| Y<br>+10°             | S3                 | 71.8                               | 74.8       | 0.04               | 69.0       | 0.04               | 50.6       | 0.30               | 74.2            | 0.03               | 70.6            | 0.02               | 67.1            | 0.07 |
|                       | S4                 | 60.3                               | 67.9       | 0.13               | 64.1       | 0.06               | 61.9       | 0.03               | 67.4            | 0.12               | 68.7            | 0.14               | 63.5            | 0.05 |
|                       | S5                 | 59.1                               | 63.8       | 0.08               | 61.7       | 0.04               | 45.7       | 0.23               | 63.1            | 0.07               | 60.8            | 0.03               | 60.7            | 0.03 |
| Y<br>-10°             | S3                 | 71.3                               | 65.0       | 0.09               | 60.2       | 0.16               | 41.0       | 0.42               | 66.0            | 0.07               | 62.5            | 0.12               | 59.5            | 0.17 |
|                       | S4                 | 71.8                               | 72.0       | 0.00               | 72.5       | 0.01               | 52.5       | 0.27               | 71.8            | 0.00               | 70.4            | 0.02               | 70.5            | 0.02 |
|                       | S5                 | 74.6                               | 74.0       | 0.01               | 71.5       | 0.04               | 50.4       | 0.32               | 72.9            | 0.02               | 72.6            | 0.03               | 71.1            | 0.05 |

**Table A15.** The detailed comparison of pressure peak ratio with various resolution grids in the XY-plane.

| Rotation/<br>Skull ID |                    | XY-plane acoustic pressure profile |            |                    |            |                    |            |                    |                 |                    |                 |                    |                |      |
|-----------------------|--------------------|------------------------------------|------------|--------------------|------------|--------------------|------------|--------------------|-----------------|--------------------|-----------------|--------------------|----------------|------|
|                       |                    | Pressure peak ratio                |            |                    |            |                    |            |                    |                 |                    |                 |                    |                |      |
|                       |                    | Actual (%)                         | 0.5mm grid |                    | 1.0mm grid |                    | 2.0mm grid |                    | 0.5&1.0mm grids |                    | 0.5&2.0mm grids |                    | 1.0&2.0mm grid |      |
| Sim. (%)              | $\Delta_F$ (Ratio) |                                    | Sim. (%)   | $\Delta_F$ (Ratio) | Sim. (%)   | $\Delta_F$ (Ratio) | Sim. (%)   | $\Delta_F$ (Ratio) | Sim. (%)        | $\Delta_F$ (Ratio) | Sim. (%)        | $\Delta_F$ (Ratio) |                |      |
| Ref<br>0°             | S3                 | 68.5                               | 69.3       | 0.01               | 68.3       | 0.00               | 22.0       | 0.68               | 69.6            | 0.02               | 68.3            | 0.00               | 68.6           | 0.00 |
|                       | S4                 | 69.4                               | 68.7       | 0.01               | 70.6       | 0.02               | 23.6       | 0.66               | 67.9            | 0.02               | 66.5            | 0.04               | 68.3           | 0.02 |
|                       | S5                 | 72.7                               | 69.6       | 0.04               | 71.0       | 0.02               | 42.2       | 0.42               | 69.5            | 0.04               | 67.6            | 0.07               | 69.0           | 0.05 |
| X<br>+10°             | S3                 | 67.5                               | 68.0       | 0.01               | 68.2       | 0.01               | 23.1       | 0.66               | 68.8            | 0.02               | 68.6            | 0.02               | 67.4           | 0.00 |
|                       | S4                 | 72.7                               | 72.3       | 0.01               | 71.0       | 0.02               | 59.0       | 0.19               | 72.1            | 0.01               | 70.2            | 0.03               | 68.1           | 0.06 |
|                       | S5                 | 67.6                               | 69.7       | 0.03               | 69.4       | 0.03               | 26.5       | 0.61               | 67.9            | 0.00               | 65.7            | 0.03               | 67.9           | 0.00 |
| X<br>-10°             | S3                 | 70.8                               | 68.1       | 0.04               | 70.5       | 0.00               | 39.1       | 0.45               | 66.8            | 0.06               | 67.3            | 0.05               | 69.5           | 0.02 |
|                       | S4                 | 61.0                               | 60.7       | 0.00               | 58.1       | 0.05               | 23.6       | 0.61               | 60.3            | 0.01               | 59.8            | 0.02               | 57.7           | 0.05 |
|                       | S5                 | 71.3                               | 69.9       | 0.02               | 68.6       | 0.04               | 64.0       | 0.10               | 70.0            | 0.02               | 67.2            | 0.06               | 68.0           | 0.05 |
| Y<br>+10°             | S3                 | 69.6                               | 71.2       | 0.02               | 70.9       | 0.02               | 36.2       | 0.48               | 72.1            | 0.04               | 71.3            | 0.02               | 69.8           | 0.00 |
|                       | S4                 | 59.1                               | 65.9       | 0.12               | 65.5       | 0.11               | 37.3       | 0.37               | 65.5            | 0.11               | 65.7            | 0.11               | 64.0           | 0.08 |
|                       | S5                 | 58.4                               | 62.8       | 0.08               | 62.1       | 0.06               | 35.8       | 0.39               | 62.2            | 0.07               | 60.7            | 0.04               | 61.5           | 0.05 |
| Y<br>-10°             | S3                 | 69.0                               | 64.7       | 0.06               | 64.1       | 0.07               | 32.2       | 0.53               | 66.3            | 0.04               | 62.9            | 0.09               | 63.5           | 0.08 |
|                       | S4                 | 70.4                               | 70.0       | 0.01               | 71.7       | 0.02               | 22.1       | 0.69               | 68.7            | 0.02               | 66.6            | 0.05               | 69.0           | 0.02 |
|                       | S5                 | 72.0                               | 72.6       | 0.01               | 71.7       | 0.00               | 49.2       | 0.32               | 72.3            | 0.00               | 69.3            | 0.04               | 70.3           | 0.02 |
